# Supplementary material for: Phylogeography of Parasyncalathium souliei (Asteraceae) and Its Potential Application in Delimiting Phylogeoregions in the Qinghai-Tibet Plateau (QTP)-Hengduan Mountains (HDM) Hotspot
Source: Front Genet. 2018 May 17;9:171. doi: 10.3389/fgene.2018.00171 (PMC5966570; doi:10.3389/fgene.2018.00171)
Supplement: Appendix 1 — List of sampling localities, herbarium voucher specimens, and GenBank accession numbers. Herbarium acronyms is as follows: KUN = Herbarium of Kunming Institute of Botany, Chinese Academy of Sciences. [file Table_1.docx]

Supplementary Material

**Phylogeography of *Parasyncalathium souliei* (Asteraceae) and** **its potential application in delimiting phylogeoregions in the Qinghai-Tibet Plateau (QTP) - Hengduan Mountains (HDM) hotspot**

**Nan Lin1,2,3#, Tao Deng3#, Michael J. Moore4, Yanxia Sun1, Xianhan Huang3, Wenguang Sun3, Dong Luo3, Hengchang Wang1,*, Jianwen Zhang3,*, Hang Sun3,***

1Key Laboratory of Plant Germplasm Enhancement and Specialty Agriculture, Wuhan Botanical Garden, Chinese Academy of Sciences, Wuhan, Hubei, China

2University of Chinese Academy of Sciences, Beijing, China

3Key Laboratory for Plant Diversity and Biogeography of East Asia, Kunming Institute of Botany, Chinese Academy of Sciences, Kunming, Yunnan, China;

4Department of Biology, Oberlin College, Oberlin, Ohio, USA;

# These authors have contributed equally to this work.

*** Correspondence:**

Hang Sun, [sunhang@mail.kib.ac.cn](mailto:sunhang@mail.kib.ac.cn);

Jianwen Zhang, [zhangjianwen@mail.kib.ac.cn](mailto:zhangjianwen@mail.kib.ac.cn);

Hengchang Wang, [hcwang@wbgcas.cn](mailto:hcwang@wbgcas.cn)

Appendix 1. List of sampling localities, herbarium voucher specimens, and GenBank accession numbers. Herbarium acronyms is as follows: KUN = Herbarium of Kunming Institute of Botany, Chinese Academy of Sciences.

| Population abbreviation／Taxon | Latitude/Longitude |  | GenBank accession numbers | Herbarium voucher specimen (KUN)/Reference |
| --- | --- | --- | --- | --- |
| AD | 29.96320° N/98.52820° E |  | MH023542-MH023545 | Zhang, Zhang & Gong 219 |
| AL | 31.63333° N /98.46111° E |  | MH023546-MH023561 | Zhang, Yang & Chen 798 |
| AW | 31.52670° N /98.51310° E |  | MH023562-MH023575 | Zhang, Zhang & Gong 215 |
| AZ | 31.12430° N /99.36820° E |  | MH023576-MH023588 | Zhang, Zhang & Gong 180 |
| BM | 28.34139° N /99.06944° E |  | MH023589-MH023601 | Zhang, Sun & Qian 005 |
| BW | 28.95249° N /100.27816° E |  | MH023602-MH023612 | Zhang, Zhang & Gong 264 |
| CN | 27.92364° N /91.85883° E |  | MH023613-MH023624 | ZJW-3997 |
| CP | 30.50620° N /99.55162° E |  | MH023625-MH023629 | SunH-07ZX-3659 |
| DD | 29.72214° N /98.02914° E |  | MH023630-MH023647 | Zhang, Sun & Qian 037 |
| DX | 31.40388° N /99.96598° E |  | MH023660-MH023675 | Zhang, Yang & Chen 930 |
| GB | 30.04778° N /101.3858° E |  | MH023676-MH023693 | SunH-07ZX-3479 |
| GE | 28.82390° N /99.20890° E |  | MH023694-MH023706 | Zhang 074 |
| GJX | 28.13611° N /99.90500° E |  | MH023707-MH023714 | Zhang, Zhang & Gong 244 |
| HS | 29.34258° N /101.50138° E |  | MH023715-MH023731 | SunH-07ZX-2376 |
| JC | 30.01111° N /100.85778° E |  | MH023732-MH023750 | Zhang, Zhang & Gong 035 |
| JZ | 32.11917° N /98.64028° E |  | MH023751-MH023764 | Zhang, Zhang & Gong 122 |
| KS | 31.45917° N /100.27361° E |  | MH023765-MH023768 | SunH-07ZX-3729 |
| KW | 30.79470° N /101.29930° E |  | MH023769-MH023771 | Zhang1026 |
| LDX | 28.58389° N /99.83833° E |  | MH023648-MH023659 | Zhang, Zhang & Gong 123 |
| LTE | 30.11528° N /100.07167° E |  | MH023772-MH023788 | SunH-07ZX-3366 |
| LTX | 30.37030° N /98.49560° E |  | MH023789-MH023798 | Zhang, Zhang & Gong 216 |
| LW | 29.55972° N /98.18406° E |  | MH023799-MH023815 | Zhang, Zhang & Gong 234 |
| ML | 28.02111° N /101.32111° E |  | MH023816-MH023824 | Kilian et al. 10971 (= ERS 5431) |
| MN | 32.03278° N /99.02528° E |  | MH023825-MH023833 | SunH-07ZX-3734 |
| MX | 29.11441° N /100.03296° E |  | MH023834-MH023843 | Zhang, Yang & Chen 887 |
| QE | 31.86764° N /99.10529° E |  | MH023844-MH023851 | Zhang, Yang & Chen 805A |
| RW | 29.49222° N /96.61611° E |  | MH023852-MH023861 | SunH-07ZX-2410 |
| SJ | 29.63778° N /94.71472° E |  | MH023862-MH023874 | SunH-07ZX-2821 |
| TT | 29.73611° N /97.77194° E |  | MH023875-MH023883 | SunH-07ZX-2408 |
| XL | 30.27000° N /100.26750° E |  | MH023884-MH023896 | Zhang, Yang & Chen 845 |
| YJ | 29.90806° N /101.99686° E |  | MH023897-MH023903 | Zhang, Yang & Chen 074 |
| YL | 27.03806° N /100.18139° E |  | MH023904-MH023916 | Kilian et al. 11242 (= ERS 5702) |
| ZD | 30.07503° N /101.79605° E |  | MH023917-MH023923 | Zhang, Yang & Chen 103 |
| ZL | 31.35301° N /97.68640° E |  | MH023924-MH023929 | ZJW-3205 |
| ZM | 29.51390° N /101.72100° E |  | MH023930-MH023939 | Zhou & Li 028 |
| ZX | 31.57470° N /98.05530° E |  | MH023940-MH023958 | Zhang, Zhang & Gong 213 |
| *Cephalorrhynchus brassicifolius* [(Boiss.) Tuisl](http://www.theplantlist.org/tpl/record/gcc-10691) |  |  | LT722339, LT722102 | Kilian et al. (2017) |
| *Cephalorrhynchus kossinskyi* (Krasch.) Kirp |  |  | LT722345, LT722108 | Kilian et al. (2017) |
| *Cephalorrhynchus takhtadzhianii* Sosn. |  |  | LT722352, LT722115 | Kilian et al. (2017) |
| *Cicerbita prenanthoides* [(M. Bieb.) Beauverd](http://www.theplantlist.org/tpl/record/gcc-115928) |  |  | LT722355, LT722118 | Kilian et al. (2017) |
| *Cicerbita thianschanica* [(Regel & Schmalh.) Beauverd](http://www.theplantlist.org/tpl/record/gcc-83607) |  |  | LT722356, LT722119 | Kilian et al. (2017) |
| *Lactuca hazaranensis* Djavadi & N. Kilian |  |  | LT722359, LT722122 | Kilian et al. (2017) |
| *Lactuca rosularis* [Boiss.](http://www.theplantlist.org/tpl/record/gcc-109457) |  |  | LT722364, LT722127 | Kilian et al. (2017) |
| *Melanoseris bracteate*  [Hook.f. & Thomson ex Hook.f.](http://www.theplantlist.org/tpl1.1/record/gcc-121737) |  |  | LT722367, LT722131 | Kilian et al. (2017) |
| *Melanoseris brunoniana* (Wall. ex DC.)N. Kilian & Ze H. Wang |  |  | LT722368, LT722132 | Kilian et al. (2017) |
| *Steptorhamphus crassicaulis* [(Trautv.) Kirp.](http://www.theplantlist.org/tpl1.1/record/gcc-34566) |  |  | LT722372, LT722140 | Kilian et al. (2017) |
| *Steptorhamphus crassicaulis* [(Trautv.) Kirp.](http://www.theplantlist.org/tpl1.1/record/gcc-34566) 1 |  |  | LT722371, LT722141 | Kilian et al. (2017) |
| *Steptorhamphus persicus* [Grossh.](http://www.theplantlist.org/tpl1.1/record/gcc-44125) |  |  | LT722374, LT722143 | Kilian et al. (2017) |
| *Steptorhamphus pumilus* [(Rech.f. & Tuisl) Tuisl](http://www.theplantlist.org/tpl1.1/record/gcc-41391) |  |  | LT722375, LT722144 | Kilian et al. (2017) |
